# Supplementary material for: Retinal Neuron Is More Sensitive to Blue Light-Induced Damage than Glia Cell Due to DNA Double-Strand Breaks
Source: MDPI journal article supplement (doi:10.3390/cells8010068), 2019-01-18
Supplement: s1 [file s1]

## Supplemental data

### Supplemental data 1

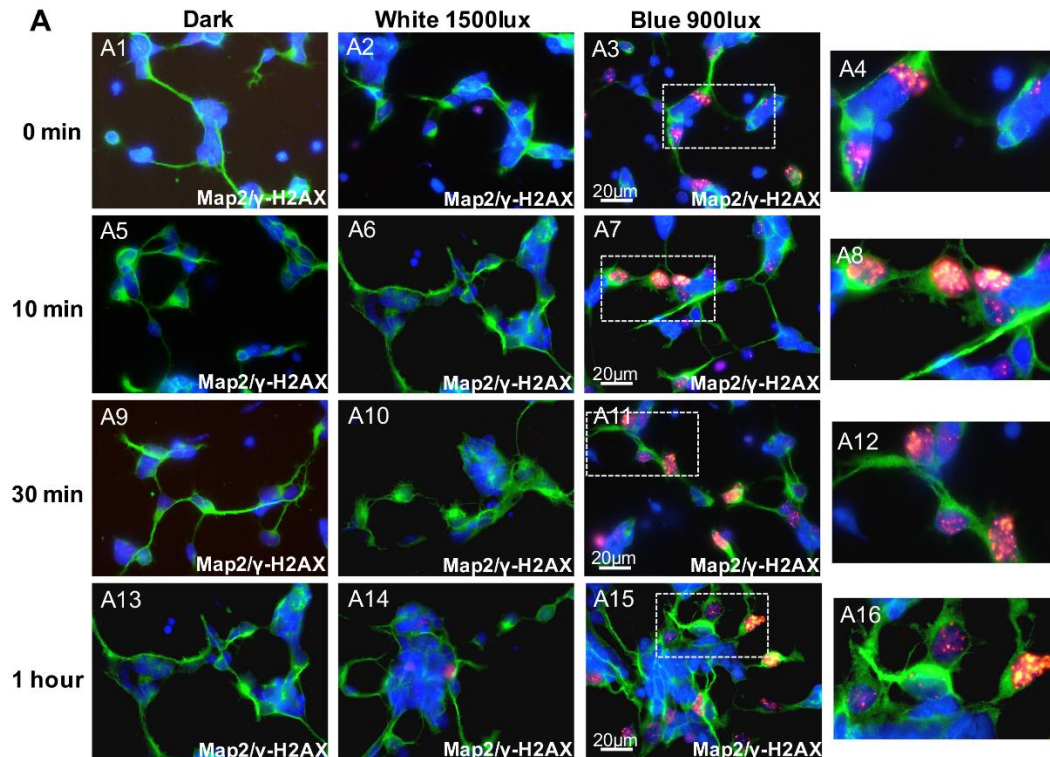

**Figure S1:  $\gamma$ -H2AX foci label DNA double-strand breaks in retina neurons.** The double staining assay were performed in retina cells 0 minute, 10 minutes, 30 minutes, 1 hour after light treatment (dark, white, blue). **A1-A3**, Double staining for Map2 and  $\gamma$ -H2AX in retinal neurons 0 minute after light treatment. **A4**, The magnification of the  $\gamma$ -H2AX foci in A3 (white dotted box). **A5-A7**, Double staining for Map2 and  $\gamma$ -H2AX in retinal neurons 10 minute after light treatment. **A8**, The magnification of the  $\gamma$ -H2AX foci in A7 (white dotted box). **A9-A11**, Double staining for Map2 and  $\gamma$ -H2AX in retinal neurons 30 minute after light treatment. **A12**, The magnification of the  $\gamma$ -H2AX foci in A11 (white dotted box). **A13-A15**, Double staining for Map2 and  $\gamma$ -H2AX in retinal neurons 10 minute after light treatment. **A16**, The magnification of the  $\gamma$ -H2AX foci in A15 (white dotted box).

## Supplemental data 2

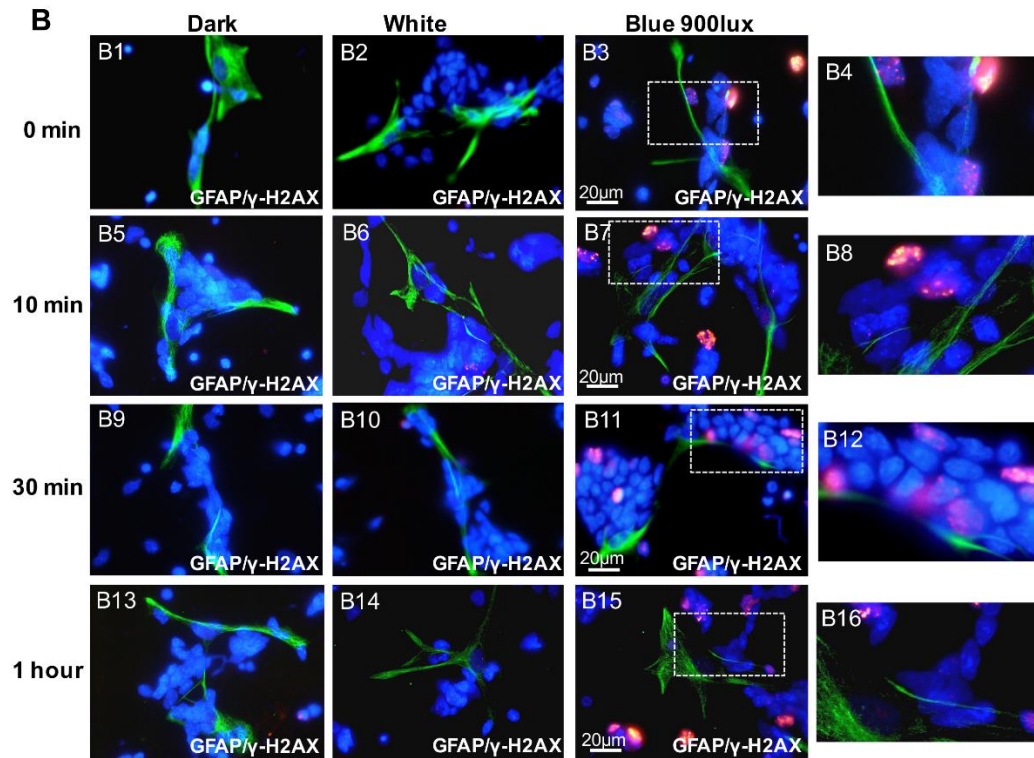

**Figure S2.  $\gamma$ -H2AX foci label DNA double-strand breaks in glia cells.** The double staining assay were performed in glia cells 0 minute, 10 minutes, 30 minutes, 1 hour after light treatment (dark, white, blue). **A1-A3**, Double staining for GFAP and  $\gamma$ -H2AX in glia cells 0 minute after light treatment. **A4**, The magnification of the  $\gamma$ -H2AX foci in A3 (white dotted box). **A5-A7**, Double staining for GFAP and  $\gamma$ -H2AX in glia cells 10 minute after light treatment. **A8**, The magnification of the  $\gamma$ -H2AX foci in A7 (white dotted box). **A9-A11**, Double staining for GFAP and  $\gamma$ -H2AX in glia cells 30 minute after light treatment. **A12**, The magnification of the  $\gamma$ -H2AX foci in A11 (white dotted box). **A13-A15**, Double staining for GFAP and  $\gamma$ -H2AX in glia cells 10 minute after light treatment. **A16**, The magnification of the  $\gamma$ -H2AX foci in A15 (white dotted box).
